# Supplementary material
Source: publisher site journal article supplement (doi:10.18632/aging.206390)
Supplement: Supplementary file 1 [file aging-v18i1-206390-supplementary-material-SD2.xlsx]

## Sheet: Lipids
Supplementary Table 1. Comprehensive lipidomic alterations in senescent BJ cells.
	Senescent-1	Senescent-2	Senescent-3	Growing-1	Growing-2	Growing-3
(+)-4-Cholesten-3-one	2541.1	2878.89	3269	1455.07	1671.08	1871.41
27-hydroxy-cholesterol	1216.32	1142.61	1264.8	0	341.965	295.667
AcCa C10:0	309.165	404.99	353.625	0	266.341	316.191
AcCa C12:0	557.619	556.27	758.602	304.386	409.505	507.831
AcCa C14:0	3860.08	4264.26	4708.9	2419.62	2730.08	2268.96
AcCa C14:1	1284.62	1564.38	1562.6	626.449	647.13	814.302
AcCa C14:2	174.01	303.199	343.502	0	0	145.53
AcCa C16:0	27473	32687.1	35290.8	7330.85	9062.57	10604.7
AcCa C17:0	624.073	875.439	799.978	0	185.619	316.828
AcCa C18:0	12368.2	14701.9	14319.4	2095.56	3047.61	4879.33
AcCa C18:1	21639.3	25745.3	23556.9	6162.73	7831.69	7307.98
AcCa C2:0	3136.27	2374.8	4189.36	0	2618.38	2275.36
AcCa C20:4	495.543	636.013	630.658	0	195.089	0
AcCa C5:0	4372.44	4460.31	5188.35	6435.23	6518.89	4942.64
AcCa C6:0	433.882	721.329	1156.74	192.301	422.714	624.769
Cer d16:1/C18:0	207912	237327	218168	103657	119535	121897
Cer d18:0/C14:0	913.005	0	1027.88	1522.86	2704.57	0
Cer d18:0/C16:0	24894.8	21110.7	22377.8	29775.8	23984.7	29698.2
Cer d18:0/C24:0	6390.81	8066.71	7331.66	4048.46	3755	5110.55
Cer d18:0/C26:0	4288.31	1895.95	2646.96	2785.11	2767.2	4167.28
Cer d18:1/C14:0	39630.1	41872.7	43264.9	27710	28552.5	30197.1
Cer d18:1/C16:0	482918	455507	460586	273617	276802	296061
Cer d18:1/C18:0	46961.7	50180.5	47799.1	24007.3	22373.4	25198.4
Cer d18:1/C18:1	15667.4	14249.9	14023.8	4849.48	5333.23	4617.8
Cer d18:1/C20:0	6201.81	6290.66	7427.72	2777.57	0	2994.31
Cer d18:1/C22:0	85584.7	94986.3	124994	42418	38230.5	46107.5
Cer d18:1/C24:0	331415	398592	370092	134863	122303	147735
Cer d18:1/C24:1	324065	349595	353396	253686	286002	301012
Cer d18:1/C25:0	12715.2	17074.3	16396.1	7027.48	7338.85	8940.84
Cer d18:1/C26:0	18417.7	22881.8	20140.6	6638.11	6241.48	8943.98
Cer d18:1/C26:1	11123.7	12074.1	11766.3	19007.1	17804.2	16970.4
Cer d18:2/C16:0	0	0	0	2994.74	3320.94	3584.6
Cer t18:1/C24:0	239370	246594	249077	168821	197336	185918
Cer t18:1/C26:0	11123.7	12804.7	13522.5	19007.1	17804.2	21458.2
ChE 20:4	11303.6	12659.8	12082	2774.39	0	0
ChE 22:4	5723.96	6907.26	7929.49	0	0	0
ChE 22:5	23457	29205.6	28940.5	3467.25	4968.41	3783.93
ChE 22:6	37537.8	42694.9	45533	6022.75	7522.84	8194.37
cholesteryl beta-D-glucoside	393.803	518.604	589.659	0	0	0
Coenzyme Q10	135394	142799	143352	82993.7	87933.5	94386
DAG 32:1	0	2606.57	2438.82	10811.3	8486.12	9737.58
DAG 34:1	30114.4	26791.3	24467.8	71990	62035.7	70142.5
DAG 36:1	21358.8	21291.6	19859.8	26154.1	25153.7	20150.6
DAG 36:2	28473.8	28652.9	24594.6	80610.3	74640.1	77238.4
DAG 38:4 (1)	3992.96	5032.21	5300.92	9725.8	13549.6	8875.8
DAG 38:4 (2)	80389.7	84361.1	59332.9	54434.1	28509.8	35094.7
DAG 38:5 (1)	6490.06	4110.21	5154.34	10148.1	7662.18	8107
DAG 38:5 (2)	14183	14458.1	12337.7	21717.1	12160	15236.5
DAG 40:5	0	9054.79	6983.62	7932.79	5705.74	5719.28
DAG 40:6 (1)	5391.83	0	0	0	5712.37	7067.7
DAG 40:6 (2)	8582.15	6829.48	5921.63	5419.33	0	4418.49
FA 12:0 Lauric acid (Dodecanoic acid)	0	101.968	0	444.626	436.902	477.882
FA 14:0 Myristic acid (Tetradecanoic acid)	4792.76	3310.5	3277.9	3150.06	3390.79	3895.85
FA 15:0 Pentadecylic acid (Pentadecanoic acid)	4202.62	2919.21	3017.16	2916.15	2881.4	3354.36
FA 16:0 Palmitic acid (Hexadecanoic acid)	200594	160072	190952	143005	171445	162537
FA 16:1 Palmitoleic acid ((Z)-9-Hexadecenoic acid)	3572.92	3127.27	2875.33	2542.62	2419.81	2828.01
FA 17:0 Margaric acid (Heptadecanoic acid)	7223.88	6562.12	6932.27	4530.14	5683.8	5850
FA 18:0 Stearic acid (Octadecanoic acid)	282746	238301	287158	216768	234552	222656
FA 18:1 (Z)-6-(Petroselinic a.)//(E)-9- (Elaidic a.)//(E/Z)-11-Octadecenoic a.(cis/tr.-Vaccenic a.)	11711	9932.17	10103.1	10390	9193.73	10651.8
FA 18:1 (Z)-9-Octadecanoic acid (Oleic acid)	68218	56458.7	57182.5	37257.5	43558.1	48573.3
FA 18:2 Linoleic a. ((Z)-9,12-octadecadienoic a.)//Linolelaidic a. (E)-9,12-octadecadienoic a.) w6	4292.96	3748.91	3720.75	2223.92	2397.96	2940.64
FA 19:0 Nonadecylic acid	2144.41	1961.4	1605.21	1639.91	1704.01	1904.07
FA 19:1 (Z)-10-Nonadecenoic acid, w9	896.913	796.76	811.629	881.105	880.122	752.277
FA 20:0 Eicosanoic acid (Arachidic acid)	9474.22	7630.19	8153.33	6696.9	7709.26	6006.93
FA 20:1 (Z)-11- Eicosenoic acid (Gondoic acid), w9 // (Z)-13- Eicosenoic acid (Paullinic acid)	4485.69	4638	4233.54	3815.04	4733.36	4479.1
FA 20:2 11,14-Eicosadienoic acid, w6// (Z)-9,12-Eicosadienoic acid	676.38	772.388	674.396	755.088	953.051	959.075
FA 20:3 (Z)-5,8,11-Eicosatrienoic acid (Mead acid), w9	1204.65	1125.33	1101.36	734.852	1114.96	1169.89
FA 20:3 (Z)-8, 11, 14- Eicosatrienoic acid (Dihomo-gamma-linolenic acid), w6	1985.32	1925.28	2471.5	481.1	675.734	667.658
FA 20:4 Arachidonic acid (5,8,11,14-Eicosatetraenoic acid), w6	13319.9	14207.9	15274.2	2221.33	2878.24	3380.2
FA 20:5 (Z)-5, 8, 11, 14, 17- Eicosapentaenoic acid (EPA), w3	3244.13	3645.65	3997.89	165.024	331.518	427.039
FA 21:0 Heneicosanoic acid	1869.4	1449.41	1763.94	1449.29	0	1568.92
FA 22:0 Behenic acid	11358.8	10019.3	9976.23	7462.67	8192.38	9604.7
FA 22:1 (Z)-13- Docosenoic acid (Eruccic acid), w9	2984.78	2754.01	2484.34	2426.22	4383.83	2372.94
FA 22:4 (Z)-7, 10, 13, 16- Docosatetraenoic acid (Adrenic acid), w6	1740.19	1954.41	2144.94	1132.73	1477.71	1895.64
FA 22:6 (Z)-4,7,10,13,16,19-Docosahexaenoic acid (DHA), w3	10408.7	11625.9	13159.9	2662.71	3872.48	4469.15
FA 23:0 Tricosylic acid	5884.08	5050.48	5635.92	5046.83	5361.7	6547.18
FA 24:0 Lignoceric acid	45355.5	38768.3	38739.2	32829.4	32546.3	36652.9
FA 24:1 (Z)-15-Tetracosenoic acid (Nervonic acid), w9	17305	19930.4	18787.9	13773.1	16061.9	16224.5
FA 25:0 Pentacosanoic acid	11256.6	10406.8	10449.7	9714.81	12350.2	14636.3
FA 26:0 Cerotic acid	29588.1	24488.4	25833	23206.5	23369.4	30707.3
FA 27:0 Carboceric acid	3725.31	3817.34	0	4575.32	4940.43	5693.09
FA 28:0 Montanic acid	8745.48	7386.73	9096.99	8625.48	8163.3	19158.5
FA 29:0 Nonacosylic acid	2052.28	1632.83	1501.63	1603.69	1808.14	2891.19
FA 30:0 Melissic acid	4180.52	4661.11	3948.88	3449.64	4317.88	5003.99
Ganglioside GM2 d18:1/C16:0	238.845	176.81	0	1798.06	1839.28	2453.65
GlcCer d18:1/C16:0	110333	123834	113647	36516.9	35194.2	46732.8
GlcCer d18:1/C18:0	6433.2	5466.06	6267.52	0	0	0
GlcCer d18:1/C24:1	131719	160625	156272	66361.2	68898.4	87269.4
GSL d16:1/C18:0	76855.3	71653.9	74404.7	33526.5	26714.1	0
GSL d18:1/C20:0	15388.7	13942.5	14522.1	14526.6	16433	15656
GSL d18:1/C22:0	95520.1	108628	89210.1	20450.5	16157.5	16263.2
GSL d18:1/C24:0	282930	333874	276809	82559.9	69151.2	77952.1
GSL d18:1/C24:1	255298	270848	244460	0	0	0
GSL t18:1/C22:0	21917.2	21246.4	19349.9	0	0	0
LacCer d18:1/24:0	54628.8	53961.7	56875.3	23240.1	16145.4	19202.3
LacCer d18:1/C16:0	10673.5	9308.57	11205.2	4682.44	4249.87	4591.62
LacCer d18:1/C22:0	17757.2	15584.1	18229.1	9638.52	8177.55	7794.43
LacCer d18:1/C24:0	17931.2	17507.8	19774.7	6043.58	5163.11	5434.29
LacCer d18:1/C24:1	14909.2	14446.9	17216	7958.88	7463.13	7642.85
LCB d16:1	316.636	276.634	338.033	147.108	120.178	175.951
LCB d18:0	359.014	427.213	426.433	0	437.575	537.133
LCB d18:1	9767.69	11754.3	11355.4	8856.56	9844.88	11749.2
lysoPC 14:0	1986.09	2049.49	2054.99	1422.64	1743.09	1550.57
lysoPC 16:0	112790	137158	127573	78518.8	94891	95168.8
lysoPC 16:1 (1)	3341.71	3790.03	3993.53	1876.14	2136.71	1709.93
lysoPC 16:1 (2)	5387.12	6250.8	6633.13	2526.32	3394.08	0
lysoPC 17:1 (1)	1099.74	1190.88	1159.6	385.638	0	312.437
lysoPC 17:1 (2)	1320.65	1533.78	1522.73	506.981	0	490.659
lysoPC 18:0	241841	297517	276026	164891	204831	212953
lysoPC 18:1 (1)	40227.9	44938	44897.6	20328.8	24651	21700.7
lysoPC 18:1 (2)	31177.2	34190.1	33600.3	17161	20449.9	20216.8
lysoPC 18:2 (1)	3245.76	3655.47	3833.38	0	0	0
lysoPC 18:2 (2)	1972.38	2166.01	2511.45	1039.45	1383.04	1262.78
lysoPC 20:0	4003.58	5504.37	5237.1	2630.1	3404.23	3947.75
lysoPC 20:1 (1)	474.237	581.571	0	768.127	733.322	622.021
lysoPC 20:1 (2)	4224.38	5086.49	4823.99	2844.86	3596.22	3801.03
lysoPC 20:4	9275.88	9090.29	11020.4	0	0	2817.57
lysoPC 20:5	884.974	747.931	895.628	0	0	0
lysoPC 22:6 (1)	1873.92	1867.28	2321.63	720.381	944.494	790.924
lysoPC 22:6 (2)	1251.46	1158.57	1515.12	852.357	911.771	920.118
lysoPE 16:0	1049.47	1307.03	1189.27	383.335	0	441.808
lysoPE 18:0	7470.87	8309.55	6912.92	2380.23	2518.76	2961.02
lysoPE 18:1	1795.9	1770.51	1967.85	602.854	617.3	809.986
LysoPE 20:4	4093.52	4367.96	4190.28	985.884	1451.84	1599.42
LysoPE 20:5	225.429	259.534	221.644	0	0	0
N-oleoyl taurine (N-OT)	1617.83	1750.33	1548.34	510.087	580.232	513.492
Palmitoyl-EA (PEA)	511.893	573.189	513.255	315.525	279.735	442.019
PC 32:0	6.16308e+06	6.83276e+06	6.40468e+06	6.71532e+06	7.56782e+06	7.86668e+06
PC 32:1 (1)	1.67081e+07	1.71245e+07	1.26027e+07	8.47845e+06	9.59036e+06	9.11455e+06
PC 32:1 (2)	887271	889461	868897	408985	459819	443147
PC 32:2 (1)	668417	749799	757001	576054	696144	628821
PC 32:2 (2)	818333	887331	953498	0	0	0
PC 34:1	2.58753e+07	2.48007e+07	2.46876e+07	2.16618e+07	2.32203e+07	2.44104e+07
PC 34:2 (1)	7.30834e+06	7.58046e+06	7.40054e+06	6.63611e+06	6.91007e+06	7.10902e+06
PC 34:2 (2)	5.85804e+06	0	0	4.60272e+06	5.14215e+06	4.93056e+06
PC 34:3 (1)	490567	538174	525672	456462	517197	480423
PC 34:3 (2)	601250	583052	635424	306026	45170.9	27409.8
PC 34:4 (1)	89921.1	89864.7	112152	36773.9	39656.7	35525.1
PC 34:4 (2)	736898	820565	821898	328375	416750	357904
PC 34:5	62606	74192.6	73887.9	16424.7	15558.5	19396.8
PC 34:6	3546.47	6736.97	7780.53	1220.64	0	0
PC 36:0	129164	145276	131668	87354.1	95792.6	95673.4
PC 36:1	1.41335e+07	1.49395e+07	1.43022e+07	6.50718e+06	7.70176e+06	7.61605e+06
PC 36:2	1.81767e+07	1.75901e+07	1.7331e+07	1.62812e+07	1.79841e+07	1.82759e+07
PC 36:3	6.4413e+06	6.53863e+06	6.5252e+06	4.09443e+06	4.21981e+06	4.15933e+06
PC 36:4 (1)	395466	446573	445165	223499	250492	335979
PC 36:4 (2)	598003	590188	607321	404748	452881	420695
PC 36:4 (3)	6.05509e+06	6.03431e+06	6.21813e+06	2.83616e+06	3.24554e+06	3.04633e+06
PC 36:5 (1)	133421	147041	148005	62182.9	77832.5	69179.6
PC 36:5 (2)	936717	996681	1.06153e+06	426236	518707	481907
PC 36:5 (3)	2.12266e+06	1.91866e+06	2.30961e+06	615617	729558	651702
PC 36:6 (1)	88843	110885	110767	27943.9	29257	26542.7
PC 36:6 (2)	227727	262123	278656	89352.8	108576	103298
PC 36:7 (1)	14190.8	17613.3	17496.6	0	0	0
PC 36:7 (2)	15264.5	17558	17084.4	0	0	0
PC 38:1	190710	186845	171098	272472	322646	308078
PC 38:2	813913	866943	874329	1.3942e+06	1.38217e+06	1.57668e+06
PC 38:3 (1)	0	62375.5	0	720719	809566	777070
PC 38:3 (2)	2.94522e+06	3.1326e+06	2.97954e+06	1.9554e+06	2.3137e+06	2.09753e+06
PC 38:4 (1)	3.0863e+06	3.07718e+06	3.15439e+06	2.61315e+06	2.72997e+06	2.7192e+06
PC 38:4 (2)	7.70817e+06	7.20767e+06	7.42849e+06	2.49499e+06	2.85166e+06	2.90843e+06
PC 38:5 (1)	1.99484e+06	1.94847e+06	2.03055e+06	1.16466e+06	1.30547e+06	1.19048e+06
PC 38:5 (2)	7.3211e+06	7.51965e+06	7.4562e+06	4.61095e+06	5.34872e+06	4.98202e+06
PC 38:6 (1)	141194	148568	156653	86401	104448	92222.5
PC 38:6 (2)	1.69051e+06	1.78632e+06	1.83649e+06	627064	754424	657267
PC 38:6 (3)	2.4109e+06	2.40525e+06	2.49987e+06	1.18768e+06	1.28105e+06	958074
PC 38:7 (1)	57126.5	70157.6	72072	0	0	14231.4
PC 38:7 (2)	184938	204811	210942	117102	131179	123693
PC 40:1 (1)	43304.7	0	0	101599	125714	125245
PC 40:1 (2)	54014.5	59253.8	61037.1	10080.2	0	0
PC 40:2	92364.7	104662	91667.5	170942	203120	198502
PC 40:3	105103	105068	101065	195941	229109	232384
PC 40:4	227546	233022	227619	205615	222966	0
PC 40:5 (1)	308465	319564	0	490441	524796	510762
PC 40:5 (2)	797828	731474	728191	388552	428129	411979
PC 40:6 (1)	827464	853505	833414	796117	861121	813226
PC 40:6 (2)	160645	176561	181831	262524	279845	0
PC 40:7	1.31637e+06	1.28598e+06	1.35038e+06	983164	1.08003e+06	94213.9
PC 40:8 (1)	107716	120091	122040	59506.5	75788.7	0
PC 40:8 (2)	81512.2	98956.2	99665.3	45426.8	60408.4	45515.9
PC 42:1 (1)	0	0	21015.6	101999	124138	125636
PC 42:1 (2)	100367	119043	102855	0	0	0
PC 42:2	98706.3	107621	99638.8	147937	184018	187555
PC 44:12	13537.4	14005	15419.3	5768.67	6278.61	6739.54
PC 44:2	73232.3	65903.3	74024.1	122651	131566	141519
PCE 34:0	1.97784e+06	2.08599e+06	2.1129e+06	3.98086e+06	4.41847e+06	4.27414e+06
PCE 34:1	101297	111125	105490	182742	197316	196484
PCo 16:0/0:0	4712.34	5855.16	5921.42	5512.96	6470.66	6834.41
PCp 16:0/0:0 (1)	3036.05	4115.23	3274.91	1047.93	944.261	1042.63
PCp 16:0/0:0 (2)	9686.21	11425.1	10638.3	3808.8	4427.63	4461.44
PE 34:4 (1)	5373.28	0	5507.73	3796.64	4511.35	4945.82
PE 34:4 (2)	7058.14	6567.54	6075.34	0	0	0
PE 36:1	525394	489414	414170	338052	315421	360330
PE 36:4	96189.4	88725.8	72900.6	61697.1	65929.9	72510.3
PE 36:5	30177.2	30244.6	29776.5	29581.6	33180.5	27525.5
PE 38:5	60934.8	0	52193.3	20939.1	25889.7	31823.2
PE 42:4	0	0	0	6115.22	5748.63	5609.61
PE 44:3	0	12278.7	11218.1	8444.85	10688.4	0
PI 36:4	3942.36	4416.17	1917.93	4596.37	3291.11	4351.27
PI 38:5	37677.2	32883.2	17379.7	43367.8	32324.5	40103
PS 36:0	876162	1.03055e+06	832641	664101	697604	706301
PS 36:1 (1)	71115.6	64623.5	75540.4	66110.7	64749.8	63985.3
PS 36:1 (2)	80124.4	83817.5	82353.8	0	0	0
PS 38:0	1.92634e+06	1.56436e+06	1.74323e+06	1.56285e+06	1.5614e+06	1.68653e+06
PS 38:1 (1)	472348	413691	413945	459112	455324	465177
PS 38:1 (2)	381560	333564	352747	0	0	0
PS 38:1 (3)	0	17039.1	0	311535	339764	347648
PS 38:2 (1)	48110.3	43333.4	45372.8	49602	49812.8	47612.4
PS 38:2 (2)	62013.7	63248.2	67410.1	0	0	0
PS 38:2 (3)	0	0	0	42651.1	42911.6	44668
PS 39:1	183890	167384	176011	130660	138697	134861
PS 40:1	1.26712e+06	1.06572e+06	1.19116e+06	1.17721e+06	1.1961e+06	1.22464e+06
PS 40:2 (1)	392330	347274	374389	279781	269627	278261
PS 40:2 (2)	38641.1	36918	35197.9	42827.3	43932	44940.6
PS 40:3	35419.7	33306.2	34745.8	20869.6	20477	19647
PS 41:1	49811.4	46677.1	44179.6	48608.8	65630.9	66144.8
PS 42:1 (1)	67225.1	65694.9	65407.1	120485	141981	127626
PS 42:1 (2)	5924.82	7994.18	6178.26	7146.39	8471.46	10045.1
PS 42:3	220248	204635	188662	200347	205570	204938
PS 42:4	125246	107533	115292	80062.5	86023.1	83479
PS 44:3	15233.1	13627	15433.4	14017.3	14732.7	13876.8
PS 44:6 (1)	9556.62	8491.7	8852.17	8456.53	8222.73	8287.48
PS 44:6 (2)	89493.7	83292.6	88140.5	75650.8	77463.6	73840.4
PS 44:7	7850.36	8853.75	10267.9	5236.6	5611.23	5157.83
Sitosteryl ester 18:2	0	1680.78	1841.04	2266.73	1180.69	0
Sitosteryl ester 18:3	5117.13	6170.24	6884.82	592.028	1958.11	269.39
SM d18:1/14:0	251434	309448	296420	337985	398328	410238
SM d18:1/16:0	5.25739e+06	5.69443e+06	5.43184e+06	5.06911e+06	5.45487e+06	5.52689e+06
SM d18:1/18:0	199179	220008	197850	100676	94575.6	104412
SM d18:1/C14:0	47381.3	52521.7	54203.8	59801.2	65844.1	71321.5
SM d18:1/C16:0	706200	731423	739810	679330	688579	759943
SM d18:1/C18:0	22589.2	24621.8	23628.6	11584.3	12222.2	13572.1
SM d18:1/C22:0	534239	595062	540982	437802	427484	432455
SM d18:1/C24:0	239304	280082	291010	178120	177196	207606
SM d18:1/C24:1	261468	308840	313888	407036	459693	483480
SM d18:1/C26:1	54706.6	60302	57989.5	233382	231585	252571
TAG 38:0	88780	77378.2	73225.2	81669.3	85345.7	87985.3
TAG 40:0	53823.4	53206.5	49871.3	48399.9	57783.1	62999
TAG 40:1	34778	17913	28518.1	27405.4	29738.3	36997.4
TAG 42:0	45286.6	39529.5	39544.5	43414.1	40520.4	46315.7
TAG 42:1	35545.8	29152.5	27271.8	29191.6	31335.4	35622.5
TAG 43:0	27852.5	21448.9	20557.3	18948.8	22252.9	26203.6
TAG 44:0	74421.9	58257.1	57241.9	51046.8	51385.3	59999.2
TAG 44:1	61091	46298.2	49970.1	43016	46203.9	48085.8
TAG 44:2	24716.4	20675	20919.3	20611.1	22811.5	19826.9
TAG 45:0	77201.1	45781.7	47512.6	47309.5	50430	54602.1
TAG 45:1	60178.4	40125.4	44252.3	35392.5	38850.5	42976.8
TAG 45:2	26561.5	20120.1	20457.9	17768.5	17141.5	19790.3
TAG 46:0	168507	133730	145120	86273.8	91865.4	98691.8
TAG 46:1	199445	150057	164315	92608.4	114718	118672
TAG 46:2	99745	77440.6	78552.1	56422.4	62263.6	67803.5
TAG 46:3	16714.2	19049.8	15011.4	8895.53	8239.03	10017.2
TAG 47:0	127903	100772	94062.9	70649.5	80228	85802.6
TAG 47:1	166747	120892	120738	83012.3	95065.1	94881.5
TAG 47:2	85263.7	59706.6	55910.9	46451.5	49563.3	56627.4
TAG 47:3	19206.4	14665.8	11278.2	11287.4	14786.5	11020.9
TAG 48:0	287236	255218	273198	109312	118302	132439
TAG 48:1	614303	596736	613700	225399	259433	273530
TAG 48:2	387037	308858	325584	161252	187078	197514
TAG 48:3	128469	117845	92948.6	46855.5	49168.8	62399.1
TAG 48:4	37690.4	44606	43278	12327.6	16964.7	12851.1
TAG 48:5	13387.3	14688.9	16067.2	3084.23	4733.61	0
TAG 49:1	320820	294795	289564	110662	123445	128847
TAG 49:2	213641	176713	173563	91453.6	104377	110595
TAG 49:4	12256.1	12690.5	11357.7	4568.06	6496.98	0
TAG 50:0	234211	235137	244626	48122.8	53807.7	58940.4
TAG 50:1	1.30444e+06	1.34112e+06	1.33194e+06	402941	448572	494807
TAG 50:2	1.20737e+06	1.19444e+06	1.19613e+06	407243	500899	496346
TAG 50:3	358822	369911	360398	171528	208079	162418
TAG 50:4	197154	200026	149717	36594.9	61097.7	40132.6
TAG 50:5	59165.1	69517.2	65831.9	8657.82	12373.5	14142
TAG 51:1	337355	355977	341561	70040.1	79318.1	85091.3
TAG 51:2	421962	411732	414953	117667	138040	148267
TAG 51:3	158230	151584	140994	0	0	0
TAG 51:4	28394.4	42739.8	33805.3	0	0	12385.1
TAG 51:5	22939.9	20982.7	19769.6	4325.88	6098.11	6025.06
TAG 51:6	14477.2	16860.5	8966.63	0	0	0
TAG 52:0	109728	113201	110686	21393.4	24622.2	0
TAG 52:1	1.00005e+06	1.03329e+06	1.00393e+06	243777	277156	302445
TAG 52:2	1.97911e+06	2.05401e+06	1.96487e+06	593724	734434	739050
TAG 52:3	1.13754e+06	1.13308e+06	1.1015e+06	454505	537716	559254
TAG 52:4 (1)	376389	386394	378790	133190	155118	161640
TAG 52:4 (2)	279103	298132	301358	0	97138.9	99496.7
TAG 52:5	247812	283711	280029	39212.9	49591.8	46603.2
TAG 52:6	142483	182540	161908	15691.8	20067.2	23588.1
TAG 52:7	32768.3	39893	42508.5	7020.06	10790.9	0
TAG 53:2	312721	328606	309932	72479.8	86450.2	93556.3
TAG 53:3	238234	253661	242654	73206.7	0	96085.8
TAG 53:4	81072.2	84030.8	78258.2	0	0	0
TAG 53:5	53865.8	59638.7	0	10708.2	22190.1	18431
TAG 53:6	44423.9	43247.2	49315.9	0	6248.71	9020.15
TAG 54:0	26858.2	25240.6	23965	11390.3	13257.1	16036.7
TAG 54:1	294302	308289	294095	99321.5	121705	131972
TAG 54:2	738406	778515	728949	161685	210049	211509
TAG 54:3	1.14238e+06	1.17229e+06	1.09099e+06	462276	554550	577905
TAG 54:4	768195	809278	781046	300139	348687	372357
TAG 54:5 (1)	0	0	0	185174	216022	236534
TAG 54:5 (2)	647959	685026	674616	105500	135435	136698
TAG 54:6	771914	810888	829439	0	0	0
TAG 54:7	283880	309065	315001	33489.3	39265.8	33508.5
TAG 54:8	60457.2	72026	73558.4	0	11743.4	9880.45
TAG 54:9	14634.6	16075.7	17494.6	0	0	0
TAG 55:7	75253.2	80261.8	78462.9	0	0	0
TAG 56:0	17294.3	14368.3	14919.8	7383.44	8937.99	9445.57
TAG 56:1	60051.4	66225.8	66494.3	12597.2	17075.9	17249.1
TAG 56:10	33741.1	35052.4	35690	0	0	0
TAG 56:2	106445	117967	107240	27947.1	38346.8	40110.2
TAG 56:3	180309	191633	176194	65624.7	88767	93416.9
TAG 56:4	382106	399522	380418	120229	156026	154118
TAG 56:5	633080	701553	691372	104945	142610	144598
TAG 56:6	703168	711065	721604	138017	186881	199201
TAG 56:7 (1)	185388	216210	208958	27894.1	33917.6	0
TAG 56:7 (2)	729101	787769	788380	60285.7	84413.2	93503.4
TAG 57:0	0	7618.61	7434.08	3970.93	4494.41	8821.31
TAG 58:0	9355.1	10034.2	8299.65	4655.27	0	4610.23
TAG 58:1	57874.4	57107.5	56303.9	8716.82	10298.5	18360.2
TAG 58:10 (1)	79671.6	86305.4	83867.4	4514.26	6329.76	0
TAG 58:10 (2)	78038.4	95158	97562.2	0	7034.81	6779.25
TAG 58:11	49277.2	53444	56014.8	0	3300.57	3949.94
TAG 58:2	77338.2	89742.4	84932.6	19774	27278.7	26918.2
TAG 58:3	56831.9	60041.6	57188.8	19270.3	26336.3	29859.8
TAG 58:4	74886.3	80960.7	76365.3	27416.6	38966.8	38938.8
TAG 58:5	270800	298722	292244	63161.6	84290.2	87484.5
TAG 58:6	510809	558225	534962	71584.1	107308	103441
TAG 58:7 (1)	385777	397648	384951	47412.9	67966.5	70055.8
TAG 58:7 (2)	351341	370001	366035	33154.2	51765.7	47876.2
TAG 58:8 (1)	109578	115255	122966	10705.1	13384.6	0
TAG 58:8 (2)	390090	424479	418949	36257.2	52264.4	59706.8
TAG 58:9	251263	269851	273900	14126.6	21869.1	24419.7
TAG 59:12	17649.8	18961.4	17417.4	15283.5	16237.9	19257.9
TAG 60:1	30056.5	30765.1	29246.5	5595.49	6872.51	6981.4
TAG 60:10 (1)	141780	152114	155652	9733.59	14248.4	15164.9
TAG 60:10 (2)	81663.7	88922.8	91505.1	6323.18	7554.4	7570.33
TAG 60:11	98221.3	109121	113051	0	10233.1	0
TAG 60:12 (1)	0	0	0	2508.45	1449.71	2352.61
TAG 60:12 (2)	56498.1	85823.7	91170.2	4213.81	5773.96	5657.77
TAG 60:13	15868.7	16928.3	17261.8	0	0	0
TAG 60:2	68974	74874.1	72414.8	16955.7	22460.5	25868.9
TAG 60:3	57529.3	62762.8	60374.6	18428	28523.7	28781.1
TAG 60:4	33937.1	39081.8	36459.2	10984.3	17209.5	17332.3
TAG 60:5	49229.4	54043.2	53152.4	17523.6	25735.1	25520.8
TAG 60:6	117962	123617	117900	30839.9	40196.4	40291.8
TAG 60:7 (1)	144390	147784	147140	29771.3	38499	38776.8
TAG 60:8 (1)	116166	125253	124486	15067.6	23218	23088.5
TAG 60:8 (2)	0	78669.2	0	12017.7	17497.9	17682.3
TAG 60:9 (1)	93975.1	99484.2	0	6261.28	10701.9	9684.9
TAG 60:9 (2)	145315	155857	158178	15308.3	20246.9	21252.3
TAG 61:1	1640.29	0	2818.3	521.171	704.308	0
TAG 62:1	6053.98	6236.94	5934.14	190.249	1595.8	918.055
TAG 62:10 (1)	59730.6	64336.8	65622.7	4545.95	6624.79	7577.13
TAG 62:10 (2)	49747.9	52780.1	51974	0	0	9813.78
TAG 62:11 (1)	40411.9	41693.4	43120.4	2382.08	0	0
TAG 62:11 (2)	91970.2	94322.7	97766.6	6899.23	7567.28	10010.5
TAG 62:12 (1)	64751.5	73207.9	76127.4	0	5244.5	5215.01
TAG 62:12 (2)	27779.9	29242.1	29355.7	2144.29	2955.61	2614.99
TAG 62:13	32692	36801.2	38097.2	0	0	0
TAG 62:2	12432	11274.9	0	0	3972.18	4119.47
TAG 62:3	28148	31922.7	29133.9	10976.2	15844.4	14895.9
TAG 62:4	23824.5	25640.1	24081.2	7143.26	11339.9	10537.8
TAG 62:5	22448.9	15577.1	13936.5	0	0	0
TAG 62:6	36790.8	37605.8	29927.8	10490.3	14135.7	17558.3
TAG 62:7 (1)	53057.8	56114.7	49464.3	14372.7	20773.3	24928.4
TAG 62:7 (2)	20139.7	20940.1	23191.7	0	0	0
TAG 62:8	0	0	0	12289.4	17481.6	17308.8
TAG 62:9	65093.7	69440.2	65555.1	7366.97	0	11002.4
TAG 64:13	12088.9	12685.3	11284.2	0	0	0
TAG 64:4	4598.21	0	0	713.677	3318.28	5159.96
TAG 64:6	21714.9	23946.5	22880.2	2058.95	0	0
TAG 64:8	14379	16512.3	16438.2	0	6859.36	0
TAG 64:9	12924	12898.1	13037.2	0	0	0

## Sheet: Polar metabolites
	Growing-1	Growing-2	Growing-3	Senescent-1	Senescent-2	Senescent-3
10-HYDROXYDECANOATE	709254	1.22134e+06	1.44139e+06	1.46171e+06	1.48749e+06	1.11184e+06
1-Deoxy-D-xylulose-5-phosphate	1.08113e+06	814625	1.17228e+06	272855	485431	470950
1-Methylhydantoin	285725	731430	593356	1.06391e+06	0	0
2,4-Dihydroxybutyric acid	367029	1569584	1.12398e+06	1.4589e+06	1.57803e+06	649678
2-Aminoadipic acid	1.14419e+07	1.27826e+07	1.16859e+07	8.78807e+06	1.00004e+07	8.88017e+06
2-AMINOISOBUTYRATE	4.27085e+06	3.45923e+06	2.2012e+06	7.55114e+06	5.63359e+06	6.13812e+06
2'-Deoxyinosine	116955	159342	220100	128750	168380	233055
2-Ethyl-2-hydroxybutyric acid	538738	2.05426e+06	1.14144e+06	2.36128e+06	1.59294e+06	2.06627e+06
2-Hydroxy-2-methylbutyric acid	3.86462e+06	5.59754e+06	4.24003e+06	4.86494e+06	5.30182e+06	4.62669e+06
2-Hydroxy-3-(4-hydroxyphenyl)-2-propenoic acid	225385	715315	1.08262e+06	919009	788196	880685
2-HYDROXYBUTYRATE	684283	1.2485e+06	1.96818e+06	2.03586e+06	1.78403e+06	2.09795e+06
2-Hydroxyethanesulphonic acid	1.17043e+06	1.37692e+06	1.58356e+06	1.14773e+06	1.11142e+06	1.60842e+06
2-Hydroxyoctanoic acid	936464	1.30985e+06	1.13709e+06	1.48682e+06	1.6517e+06	1.13662e+06
2-Ketobutyric acid	2.79762e+06	807236	0	1.23287e+06	0	955533
2-Octenoic acid	727487	6.8747e+06	7.4372e+06	8.88709e+06	9.47514e+06	3.38475e+06
2-PHOSPHOGLYCERATE	1.60849e+07	1.86979e+07	1.94215e+07	1.56272e+07	2.99124e+07	2.10588e+07
2-Propylpentanoic acid	2.47574e+06	2.1184e+07	2.81383e+07	3.43062e+07	3.1482e+07	1.05507e+07
2-QUINOLINECARBOXYLATE	2.44872e+07	2.42888e+07	3.07125e+07	2.72542e+07	2.97017e+07	4.17153e+07
3-Amino-4-methyl-pentanoic acid	7.12832e+08	748477405	6.66034e+08	1009381730	1130237035	9.85216e+08
3-Hydroxy-2-methyl-4-pyrone	514811	933308	188606	2.00865e+06	143427	530889
3-HYDROXYBENZALDEHYDE	2.52715e+06	7.83872e+06	9.0372e+06	8.83102e+06	9.03228e+06	3.5433e+06
3-HYDROXYBENZOATE	2.64898e+06	2.6485e+06	1.74303e+06	4.30159e+06	4.75302e+06	5.12398e+06
3-Hydroxybutyric acid	3.13638e+06	5.81625e+06	4.1698e+06	7.28409e+06	7.96058e+06	6.97611e+06
3-HYDROXYMETHYLGLUTARATE	3.56329e+07	4.91161e+07	3.58573e+07	6.81744e+07	8.38598e+07	9.68267e+07
3-HYDROXYPHENYLACETATE	508448	810760	665867	848074	289264	640854
3-Methyl-2-oxobutyrate	1.377e+06	1.93045e+06	1.57623e+06	1.83403e+06	1.96158e+06	1.39553e+06
3-Methyl-2-oxopentanoic acid	3.00391e+06	2.95863e+06	3.99035e+06	5.80827e+06	6.39716e+06	3.9425e+06
3-Methylglutaconic acid	1.96351e+06	2.0737e+06	2.0788e+06	2.81979e+06	2.4552e+06	2.42559e+06
3-Methyl-L-histidine	1.54834e+06	1.57316e+06	1.57672e+06	2.38357e+06	2.57227e+06	2.2139e+06
3-NITRO-L-TYROSINE	303984	1.57876e+06	1.2347e+06	1.03476e+06	56724	0
4-ACETAMIDOBUTANOATE	1.23118e+06	1.66607e+06	1.43476e+06	1.92085e+06	1.4927e+06	1.714e+06
4-Imidazoleacrylic acid	6.6441e+06	5.31576e+06	3.74723e+06	6.14579e+06	4.94085e+06	4.47098e+06
4-Nitrophenol	554878	1.47944e+06	1.0604e+06	1.33361e+06	1.66918e+06	815778
4-PYRIDOXATE	358896	808993	631099	835507	837319	445276
5-AMINOPENTANOATE	4.53156e+06	2.30037e+06	1.63708e+06	915468	1.5963e+06	1.77879e+06
5-Keto-D-gluconic acid	1.83077e+07	2.05939e+07	2.07685e+07	9.32962e+06	1.17263e+07	9.85532e+06
5-Phenylvaleric acid	821566	5.34543e+06	4.7955e+06	4.78941e+06	5.33082e+06	3.17746e+06
6-PHOSPHOGLUCONATE	2.0092e+06	1.2824e+06	967412	4.92362e+06	6.85546e+06	2.47627e+06
Acetyl coenzyme A	307341	341673	650797	67416.8	498527	407002
Ac-Val-OH	987283	1.148e+06	969685	1.06196e+06	1.25526e+06	931759
ADENINE	4.00944e+07	7.29112e+07	7.34475e+07	4.25245e+07	4.8791e+07	4.36362e+07
ADENOSINE	9.17333e+06	1.61724e+07	1.6568e+07	9.19473e+06	1.06141e+07	9.27389e+06
ADENOSINE 3',5'-DIPHOSPHATE	3.2724e+07	3.28163e+07	3.0894e+07	3.35808e+07	4.3119e+07	3.22037e+07
Adenosine 5′-monophosphate	2.2082e+06	3.58213e+06	4.04284e+06	45016.8	0	28990.3
ADENOSINE 5'-DIPHOSPHATE	3.59984e+07	4.87491e+07	4.87216e+07	2.09781e+07	1.8593e+07	1.76411e+07
ADENOSINE TRIPHOSPHATE	2.81004e+08	3.0406e+08	2.60831e+08	3.12048e+08	3.94658e+08	2.94514e+08
Alanine	1.38877e+08	1.39316e+08	1.31007e+08	2.26211e+08	2.67509e+08	2.44717e+08
ALLANTOIN	4.74329e+06	6.12243e+06	5.695e+06	7.50725e+06	7.82938e+06	5.83653e+06
ALLOTHREONINE	5.08761e+08	4.95053e+08	4.34405e+08	9.32212e+08	1096193942	1043676350
Alpha-Hydroxyglutaric acid	8.46674e+07	9.22717e+07	8.75049e+07	165793327	1.83754e+08	1.62404e+08
ALPHA-HYDROXYISOBUTYRATE	684283	882434	1.1132e+06	1.18601e+06	1.4243e+06	1.38469e+06
Alpha-Ketoglutaric acid	2.62029e+06	3.22155e+06	2.65366e+06	2.28975e+06	1.89272e+06	2.22871e+06
Arabinose	1.17281e+07	1.44071e+07	1.30218e+07	5.05056e+06	5.53141e+06	5.0164e+06
Arabitol	3.4882e+06	3.50488e+06	3.34674e+06	1.42342e+07	1.69673e+07	1.47454e+07
Arginine	6.34999e+07	7.50038e+07	7.06494e+07	8.79296e+07	9.69164e+07	8.52807e+07
Argininosuccinic acid	2.53612e+06	2.37025e+06	2.60016e+06	2.20024e+06	2.5155e+06	2.34363e+06
ASPARAGINE	1.82433e+07	1.95621e+07	1.70094e+07	1.91895e+07	2.32899e+07	1.89956e+07
ASPARTATE	1184089361	1260496725	1132146827	6.67909e+08	8.73372e+08	8.25789e+08
AZELATE	3.35443e+06	512605	636795	3.48726e+06	1.31356e+06	3.19127e+06
BENZOATE	8.09417e+06	2.95907e+07	3.45327e+07	3.71277e+07	3.57772e+07	1.781e+07
BETA-ALANINE	6.88011e+07	8.52595e+07	8.8199e+07	6.73428e+07	8.08023e+07	7.98278e+07
BETA-NICOTINAMIDE ADENINE DINUCLEOTIDE	3.14775e+07	3.2596e+07	2.45465e+07	4.55739e+07	4.01114e+07	3.74467e+07
Carnitine	895785	904133	663610	474572	514563	796328
CARNOSINE	1.0845e+06	1.41738e+06	1.21009e+06	2.57903e+06	2.77697e+06	2.43357e+06
Choline glycerophosphate	5.75888e+06	8.19797e+06	6.99006e+06	9.11811e+07	9.72404e+07	8.7847e+07
cis-Aconitic acid	7.56419e+06	1.25634e+07	1.39324e+07	2.80458e+07	3.03767e+07	2.84244e+07
CITICOLINE	834461	884264	860112	1.9828e+06	2.92058e+06	2.32455e+06
CITRATE	7.86828e+07	8.97757e+07	107156975	1.47518e+08	168477031	1.49556e+08
CITRULLINE	2.47091e+06	2.71212e+06	2.16509e+06	1.62413e+06	1.40052e+06	1.26552e+06
CREATINE 86ppm	7.79547e+07	7.52635e+07	7.10752e+07	1.11213e+08	1.36436e+08	1.24255e+08
CREATININE	7.29248e+06	6.79549e+06	7.55732e+06	1.23168e+07	1.17904e+07	1.30893e+07
Crotonic acid	4.2285e+06	6.85975e+06	4.3772e+06	3.97064e+06	3.90227e+06	3.6621e+06
CYCLIC AMP	1.17364e+06	1.5615e+06	1.63041e+06	1.72885e+07	3.17445e+07	4.4265e+07
Cyclohexanecarboxylic acid	108493	2.0707e+06	2.14238e+06	2.50006e+06	2.97501e+06	1.37627e+06
CYSTATHIONINE	2.41298e+07	2.11219e+07	2.16771e+07	1.22158e+07	1.38871e+07	1.30195e+07
CYSTEATE	388525	533987	423459	584275	612593	556708
Cysteine	375542	168178	228872	790425	845406	691064
Cystine	1.87449e+06	1.2573e+06	1.2851e+06	8.35541e+06	9.25694e+06	8.40182e+06
CYTIDINE	1.30938e+06	1.07028e+06	1.53091e+06	700049	1.13951e+06	1.20005e+06
CYTIDINE 2',3'-CYCLIC PHOSPHATE	7.29465e+06	9.74134e+06	1.06747e+07	8.17076e+06	7.3161e+06	5.66518e+06
CYTIDINE DIPHOSPHATE	3.04876e+06	3.88386e+06	3.85891e+06	2.09939e+06	1.86587e+06	1.80242e+06
CYTIDINE MONOPHOSPHATE	814144	1.06831e+06	1.26147e+06	1.65211e+06	1.6434e+06	1.42337e+06
CYTIDINE TRIPHOSPHATE	2.39624e+07	2.43179e+07	2.19359e+07	3.1892e+07	4.04977e+07	3.05748e+07
DEOXYGUANOSINE	240572	257693	234135	33613.9	91565.8	39082.8
DEOXYGUANOSINE-MONOPHOSPHATE	2.47475e+06	3.01591e+06	3.55239e+06	989036	999361	869543
DEOXYURIDINE	323213	391645	423513	805555	874999	884351
DIHYDROXYACETONE PHOSPHATE	3.94494e+07	5.70638e+07	6.86791e+07	9.65382e+07	8.30456e+07	7.44509e+07
Dimethylmalonic acid	0	784591	1.385e+06	318892	1.42787e+06	606483
D-RIBOSE 5-PHOSPHATE	2.86891e+06	6.78116e+06	8.46285e+06	1.91396e+07	2.69341e+07	2.77934e+07
D-Sorbitol	1.48018e+08	1.52236e+08	1.3418e+08	4.95023e+08	5.707e+08	5.43321e+08
ERYTHRITOL	5.66334e+06	5.88074e+06	5.10552e+06	9.55902e+06	1.02292e+07	9.12662e+06
Flavin adenine dinucleotide (FAD)	691245	893338	803077	232813	256500	480664
FOLATE	106995	199387	296205	500436	384329	268082
Fructose	1.75169e+07	1.96529e+07	1.53449e+07	2.79306e+07	2.65982e+07	2.39158e+07
FRUCTOSE BISPHOSPHATE	7.53899e+07	4.41568e+07	4.48519e+07	1.40937e+07	4.33339e+07	3.6145e+07
Fumaric acid	6.44897e+07	6.26991e+07	6.20448e+07	5.17044e+07	5.81692e+07	6.09062e+07
GAMMA-AMINOBUTYRATE	120195162	1.2385e+08	1.17494e+08	1.21154e+08	1.49278e+08	1.35762e+08
Gamma-Glu-epsilon-Lys	2.37419e+06	3.04233e+06	3.2637e+06	8.93295e+06	1.02063e+07	9.71128e+06
Gamma-L-Glutamyl-L-alanine	222597	149361	207403	2.38502e+06	3.41922e+06	2.91276e+06
Gluconate	3.47497e+07	6.84739e+07	6.8676e+07	1.60615e+08	1.99363e+08	1.69021e+08
Glucose	1.45671e+07	3.28031e+07	3.07754e+07	1.02547e+08	4.98884e+07	2.92632e+07
GLUCOSE 1-PHOSPHATE	2.00091e+07	1.7863e+07	1.81533e+07	4.50207e+07	5.26515e+07	4.89859e+07
GLUCOSE 6-PHOSPHATE	1.96394e+07	2.65878e+07	2.9027e+07	7.56344e+07	8.81623e+07	7.81107e+07
GLUCURONATE	8.64885e+06	1.00516e+07	9.45499e+06	8.64954e+06	1.08446e+07	9.81538e+06
GLUTAMATE	4238059780	4491486555	4152931201	4435362393	5246363126	4797400897
Glutamic acid 5-methyl ester	9.7113e+06	8.20735e+06	9.13715e+06	2.64055e+07	3.39202e+07	3.8259e+07
GLUTAMINE	6.4267e+08	671570769	546295497	1526058583	1686095223	1442701072
Glutathione oxidized	3.06101e+07	3.14048e+07	2.89986e+07	2.94373e+07	3.30132e+07	2.83005e+07
GLUTATHIONE REDUCED	5.69711e+07	7.11858e+07	5.515e+07	1.45089e+07	6.57072e+07	5.13282e+07
Glyceraldehyde 3-phosphate	5.42257e+06	5.88723e+06	4.02899e+06	2.31999e+07	1.73715e+07	1.97621e+07
GLYCERATE	2.19489e+07	2.51148e+07	2.92003e+07	6.32002e+07	6.37012e+07	7.02495e+07
GLYCEROL 3-PHOSPHATE	3.6623e+07	3.74593e+07	3.68339e+07	5.92379e+07	6.57568e+07	5.71724e+07
GLYCINE	9.72252e+07	8.95914e+07	8.40874e+07	1.11245e+08	1.27645e+08	1.10446e+08
Glycyl-L-tyrosine	173485	190351	203813	1.72185e+06	2.28106e+06	3.04568e+06
Gly-Gly	5.50667e+06	5.59161e+06	5.01638e+06	6.04275e+06	6.98334e+06	6.80938e+06
GUANOSINE	1.45226e+07	1.86796e+07	2.17046e+07	3.02586e+07	3.65792e+07	3.52476e+07
GUANOSINE DIPHOSPHATE	3.96145e+06	5.33677e+06	5.27376e+06	2.20781e+06	1.9001e+06	1.82014e+06
GUANOSINE DIPHOSPHATE MANNOSE	1.25411e+06	1.2359e+06	878956	1.15167e+06	1.48372e+06	1.11838e+06
GUANOSINE TRIPHOSPHATE	3.38256e+07	3.79743e+07	3.4218e+07	3.5211e+07	4.57896e+07	3.42948e+07
Gulonic acid gamma-lactone	4.56181e+06	5.47621e+06	4.38303e+06	2.13795e+06	3.03406e+06	2.42266e+06
Gulose	1.54943e+07	2.89807e+07	3.26204e+07	0	4.80876e+07	3.48478e+07
Heptanoic acid	1.19262e+06	6.91844e+06	7.69433e+06	1.02495e+07	1.0792e+07	3.47147e+06
HEXANOATE	2.70796e+06	1.15486e+07	1.71271e+07	2.70734e+07	1.79373e+07	8.07233e+06
HIPPURATE	2.33035e+06	3.34148e+06	2.86947e+06	3.47273e+06	3.24022e+06	2.41049e+06
HISTIDINE	1.6657e+07	1.85971e+07	1.84223e+07	1.32129e+07	1.6043e+07	1.58267e+07
HYDROXYPHENYLLACTATE	4.51279e+06	5.3557e+06	5.14037e+06	1.78972e+07	1.97216e+07	1.83434e+07
HYPOTAURINE	1.61326e+07	1.81234e+07	1.52872e+07	8.41799e+06	9.1715e+06	8.45115e+06
HYPOXANTHINE	86689.7	399702	401765	690342	348604	345134
Imidazolepropionic acid	1.17717e+06	2.33394e+06	1.3792e+06	3.65917e+06	4.1445e+06	1.69944e+06
Indole-3-lactic acid	169419	245515	233566	592001	627694	478596
INOSINE	324476111	4.3297e+08	5.32752e+08	8.29095e+08	1017772122	9.23649e+08
ISOLEUCINE	794442014	8.52691e+08	7.65199e+08	1026429561	1159290511	1030050145
Isovaleric acid	3.01891e+06	5.24147e+06	4.45537e+06	2.70443e+06	3.55856e+06	3.488e+06
Isovaleryl-L-carnitine	1.29003e+06	1.46323e+06	1.25932e+06	1.10813e+06	1.40783e+06	1.30954e+06
ITACONATE	5.02857e+06	5.16345e+06	4.90639e+06	1.17377e+07	1.31201e+07	1.10311e+07
KYNURENATE	1.70853e+06	2.2928e+06	2.16031e+06	449954	305946	343586
KYNURENINE	243138	153944	126258	2.48464e+06	2.92859e+06	2.43567e+06
Lactic acid	1194006272	1083801386	1097749329	1388743646	1605871235	1335422996
Lactobionic acid	495409	594879	561725	340578	327539	267313
Leu-Ala	568556	584808	745544	1.16654e+06	1.75617e+06	1.81225e+06
Leucine	7.09604e+08	7.48292e+08	6.65714e+08	1008033675	1129105825	9.84853e+08
Leu-Gly	8.63807e+06	7.17627e+06	9.38671e+06	9.38416e+06	1.22456e+07	1.27246e+07
Levulinic acid	675258	5.20136e+06	6.16216e+06	4.65802e+06	4.63092e+06	3.20151e+06
L-Methionine sulfoxide	1.1055e+07	1.06733e+07	9.74698e+06	1.34139e+07	1.34662e+07	1.24839e+07
Lysine	4.82616e+07	5.45537e+07	5.55282e+07	6.6117e+07	7.41567e+07	6.62048e+07
Malic acid	1324310124	1428396928	1372024058	1099604067	1227209337	1321693152
METHIONINE	1.46901e+08	1.57819e+08	1.43911e+08	266930597	302661776	2.62947e+08
Methyl 4-aminobutyrate	9.16963e+06	0	1.26901e+06	2.11446e+07	0	1.73364e+06
METHYL GALACTOSIDE	2.2781e+06	2.74971e+06	2.89091e+06	5.36476e+06	7.05557e+06	7.45075e+06
Myo-Inositol	4.60787e+08	4.52769e+08	4.00987e+08	8.94136e+07	9.41398e+07	9.33082e+07
N-(2-Methylbutyryl)glycine	628155	766106	671275	862993	738512	678204
N-(phenylacetyl)glycine	4.9061e+06	5.62153e+06	5.36927e+06	7.55301e+06	8.53389e+06	7.86357e+06
N-ACETYLALANINE	1.88062e+07	2.18845e+07	2.17998e+07	3.00161e+07	3.42339e+07	3.21489e+07
N-Acetyl-Asp-Glu	959387	944242	1.08231e+06	2.60633e+06	3.12645e+06	3.01526e+06
N-Acetylglucosamine	1.38704e+06	1.3847e+06	1.2808e+06	477467	730891	1.05858e+06
N-ACETYLGLUTAMATE	2.17595e+07	2.25857e+07	2.13634e+07	3.7673e+07	4.18391e+07	3.83068e+07
N-ACETYLGLYCINE	6.319e+06	4.27531e+06	6.45843e+06	4.13518e+06	5.01032e+06	4.89991e+06
N-Acetyl-L-aspartic acid	7.2882e+07	8.09761e+07	7.75788e+07	4.09085e+08	4.611e+08	429667147
N-ACETYLLEUCINE	300006	474933	336280	716255	657465	582206
N-Acetyl-L-glutamine	6.24038e+06	5.87563e+06	5.70654e+06	8.93853e+06	9.76598e+06	9.2957e+06
N-Acetyl-L-methionine	2.92809e+06	3.83783e+06	3.4544e+06	3.57796e+06	4.13262e+06	3.62868e+06
N-ACETYLNEURAMINATE	2.64488e+07	2.8022e+07	2.88327e+07	5.30059e+07	6.78751e+07	6.51728e+07
N-ACETYLPHENYLALANINE	92596.9	113669	74979.8	201256	158139	227080
NADH (Nicotinamide adenine dinucleotide (reduced)) (2)	3.41228e+07	4.49553e+07	5.6833e+07	4.80888e+07	8.56217e+07	7.69565e+07
NADP	2.71339e+06	2.98192e+06	3.13008e+06	4.14081e+06	4.74399e+06	4.80813e+06
N-Butyrylglycine	475103	641247	453955	518616	511358	498396
Nepsilon-Acetyl-L-lysine	573638	669844	588484	939451	908709	594750
N-FORMYL-L-METHIONINE	5.50609e+06	6.61506e+06	7.30763e+06	6.25889e+06	7.12356e+06	6.7762e+06
NICOTINAMIDE	6.23224e+06	6.08039e+06	7.9734e+06	2.96236e+07	3.38123e+07	2.55809e+07
O-ACETYLSERINE	222346709	241104973	2.30604e+08	1.79609e+08	2.08941e+08	1.96086e+08
O-PHOSPHOETHANOLAMINE	570181	813272	804618	7.44825e+07	8.24654e+07	7.00013e+07
OPHTHALMATE	4.38017e+06	5.266e+06	4.60206e+06	1.40083e+07	1.77893e+07	1.48273e+07
ORNITHINE	8.94443e+06	9.37391e+06	8.73001e+06	7.98422e+06	1.01656e+07	9.38935e+06
OROTATE	48225.4	0	41620.9	652013	796527	1.45023e+06
Orotidine	1.05256e+07	1.05041e+07	1.01424e+07	1.25372e+06	1.31015e+06	1.36258e+06
o-Toluic acid	724611	1.32228e+06	1.48173e+06	1.88182e+06	3.40885e+06	1.40573e+06
OXALATE	2.08476e+07	2.75254e+07	2.07614e+07	2.32902e+07	2.49555e+07	2.17492e+07
PANTOTHENATE	5.12796e+08	5.41311e+08	5.10685e+08	9.20918e+08	1102809477	9.83287e+08
Phe-Ala	100266	90908.5	195126	273071	458759	392756
Phe-Gly	330146	314134	259860	362418	1.44534e+06	679324
Phenol Red	1.72152e+07	2.73948e+07	27272043	4.04832e+07	4.14059e+07	3.40569e+07
PHENYLALANINE	4.64399e+08	5.00379e+08	4.57923e+08	6.67328e+08	7.42463e+08	6.65513e+08
Phenylglyoxylic acid	227837	323994	459123	546866	568060	281632
Phenylpyruvic acid	258956	420469	718303	563226	941684	510093
PHOSPHOCREATINE	1.6792e+08	189285258	1.66969e+08	5.61878e+08	6.29535e+08	570179029
PHOSPHOENOLPYRUVATE	7.56535e+06	9.1872e+06	8.61417e+06	7.44292e+06	1.18238e+07	8.54067e+06
PHOSPHONOACETATE	23818.5	53744.1	104891	317142	390406	240227
Phosphoric acid	1423656756	2578696697	2410403964	3199464960	3398258107	2651333569
PHOSPHORYLCHOLINE	4.28562e+07	5.06524e+07	4.64022e+07	4.90402e+07	5.94443e+07	5.5142e+07
PHOSPHOSERINE	665813	712147	617847	1.47334e+06	1.71228e+06	1.66492e+06
Pro-Gly	296815	701044	359657	2.45138e+06	4.86983e+06	2.00268e+06
PROLINE	3.14369e+08	290512943	2.73333e+08	3.55224e+08	4.48257e+08	4.02043e+08
PROPIONATE	3.82569e+06	3.1795e+06	4.02576e+06	4.26575e+06	5.65023e+06	4.72129e+06
Pseudouridine	2.16415e+06	2.9454e+06	2.95562e+06	4.10307e+06	4.0044e+06	3.04629e+06
Psicose	0	1.91206e+06	2.6719e+06	1.81777e+06	0	3.46698e+06
Pyridoxine	8.93547e+06	1.21984e+07	1.01065e+07	1.16198e+07	1.06346e+07	8.83501e+06
PYROGLUTAMATE	2324930795	3084862163	2740708949	3346823989	3434206892	2815824700
PYRROLE-2-CARBOXYLATE	817987	1.08137e+06	992892	5.04503e+06	4.94001e+06	5.2689e+06
Pyruvic acid	9.19052e+07	7.26623e+07	8.60993e+07	6.47119e+07	1.7111e+08	156459296
QUINATE	6.78698e+06	2.15832e+06	1.52455e+06	1.61674e+06	1.53472e+06	2.0343e+06
Riboflavin 5'-phosphate	647574	735789	862595	3.80301e+06	4.58253e+06	3.6696e+06
Ribose	7.2278e+06	8.25451e+06	7.48379e+06	2.21317e+06	2.56889e+06	1.62062e+06
S-(5'-Adenosyl)-L-methionine	499811	346738	314089	446261	605208	481989
SACCHARATE	2.64292e+06	2.76519e+06	3.29873e+06	4.35863e+06	4.93569e+06	3.63724e+06
Saccharic acid 1,4-lactone	4.68978e+06	4.25881e+06	4.37876e+06	4.69608e+06	3.15888e+06	3.15586e+06
Saccharopine	257274	66388.9	35927	673218	732149	651805
S-ADENOSYLHOMOCYSTEINE	1.71039e+06	2.0432e+06	2.19851e+06	1.70562e+06	2.00716e+06	1.91711e+06
SALICYLATE	838978	1.26269e+06	1.15082e+06	1.4816e+06	754790	818566
Sedoheptulose 7-phosphate	2.558e+06	2.39594e+06	2.75722e+06	1.25669e+07	1.49758e+07	12373598
SERINE	5.87637e+07	5.75596e+07	4.86625e+07	1.20699e+08	1.39696e+08	127319117
SUBERATE	1.34039e+06	1.53476e+06	1.16909e+06	1.87536e+06	1.38814e+06	1.70109e+06
SUCCINATE	3.68417e+07	4.29423e+07	4.07922e+07	4.23106e+07	5.3277e+07	4.38865e+07
Sucrose	2.6782e+06	100208	0	82183.6	0	71281.7
Tartrate	172618	481708	1.00826e+06	1.24528e+06	1.3335e+06	1.14544e+06
TAURINE	1897130896	2259366320	1915397160	1007418926	1131270151	1007891858
THIAMINE PYROPHOSPHATE	103097	204650	175433	141665	340426	205510
Threonic acid	2.62106e+08	3.1016e+08	3.11206e+08	5.5262e+08	5.93044e+08	4.95771e+08
THREONINE	5.08583e+08	4.9787e+08	4.35432e+08	9.32791e+08	1095334581	1042658751
Thymol	920256	1.24682e+06	1.73073e+06	2.21561e+06	2.01367e+06	1.56636e+06
TRANS-4-HYDROXY-L-PROLINE	1.35818e+07	1.30668e+07	1.18919e+07	2.34949e+07	2.71355e+07	2.49078e+07
TREHALOSE	2.74864e+06	2.89093e+06	2.93648e+06	1.00294e+06	1.46289e+06	995090
Tricarballylic acid	475392	563330	594352	715943	861646	792223
TRYPTOPHAN	1.38104e+08	153074291	1.41941e+08	212893028	2.49141e+08	2.20467e+08
TYROSINE	2.79135e+08	290531135	2.53213e+08	356956075	3.97972e+08	3.96478e+08
URACIL	647210	0	0	4.90748e+06	9.57771e+06	6.90883e+06
Ureidosuccinic acid	23321	17536.5	107639	1.33606e+06	1.56839e+06	1.70338e+06
Uric acid	1.58008e+07	2.7359e+07	2.56632e+07	3.8435e+07	3.77314e+07	2.86795e+07
URIDINE	1.58183e+08	1.79891e+08	1.83363e+08	8.72534e+08	1000667489	8.45282e+08
URIDINE 5'-DIPHOSPHATE	1.07811e+07	1.3698e+07	1.41456e+07	5.81058e+06	5.25042e+06	4.72999e+06
Uridine 5'-monophosphate	877042	1.17062e+06	1.03199e+06	26983.8	60750	134000
URIDINE DIPHOSPHATE GLUCOSE	5.62929e+07	6.27911e+07	6.99609e+07	5.60861e+07	7.03961e+07	7.1494e+07
URIDINE DIPHOSPHATE GLUCURONIC ACID	7.58823e+06	8.48043e+06	9.85436e+06	2.85992e+06	4.0784e+06	5.36275e+06
URIDINE DIPHOSPHATE-N-ACETYLGLUCOSAMINE	7.22163e+07	8.53604e+07	8.47841e+07	6.08884e+07	7.51473e+07	9.06358e+07
URIDINE TRIPHOSPHATE	7.94363e+07	7.85056e+07	7.00296e+07	8.01655e+07	9.96189e+07	7.96306e+07
Valeric acid	1.76386e+06	2.74095e+06	2.94666e+06	3.08333e+06	2.08882e+06	2.21498e+06
VALINE	2.93111e+08	3.08518e+08	275383511	3.37128e+08	3.99586e+08	3.49064e+08
Vanillin	934925	2.32273e+06	2.16059e+06	3.21574e+06	3.54678e+06	1.4757e+06
XANTHINE	1.21834e+07	1.8254e+07	1.61727e+07	2.35225e+07	2.85542e+07	2.22249e+07
XANTHOSINE	326810	487373	325262	3.90648e+06	4.12836e+06	3.85271e+06
