# Supplementary material
Source: publisher site journal article supplement (doi:10.18632/aging.206390)
Supplement: Supplementary file 2 [file aging-v18i1-206390-supplementary-material-SD3.xlsx]

## Sheet: Polar metabolites
Supplementary Table 2. Comprehensive polar metabolomic alterations in senescent BJ cells.
	Growing-1	Growing-2	Growing-3	Senescent-1	Senescent-2	Senescent-3
10-HYDROXYDECANOATE	709254	1.22134e+06	1.44139e+06	1.46171e+06	1.48749e+06	1.11184e+06
1-Deoxy-D-xylulose-5-phosphate	1.08113e+06	814625	1.17228e+06	272855	485431	470950
1-Methylhydantoin	285725	731430	593356	1.06391e+06	0	0
2,4-Dihydroxybutyric acid	367029	1569584	1.12398e+06	1.4589e+06	1.57803e+06	649678
2-Aminoadipic acid	1.14419e+07	1.27826e+07	1.16859e+07	8.78807e+06	1.00004e+07	8.88017e+06
2-AMINOISOBUTYRATE	4.27085e+06	3.45923e+06	2.2012e+06	7.55114e+06	5.63359e+06	6.13812e+06
2'-Deoxyinosine	116955	159342	220100	128750	168380	233055
2-Ethyl-2-hydroxybutyric acid	538738	2.05426e+06	1.14144e+06	2.36128e+06	1.59294e+06	2.06627e+06
2-Hydroxy-2-methylbutyric acid	3.86462e+06	5.59754e+06	4.24003e+06	4.86494e+06	5.30182e+06	4.62669e+06
2-Hydroxy-3-(4-hydroxyphenyl)-2-propenoic acid	225385	715315	1.08262e+06	919009	788196	880685
2-HYDROXYBUTYRATE	684283	1.2485e+06	1.96818e+06	2.03586e+06	1.78403e+06	2.09795e+06
2-Hydroxyethanesulphonic acid	1.17043e+06	1.37692e+06	1.58356e+06	1.14773e+06	1.11142e+06	1.60842e+06
2-Hydroxyoctanoic acid	936464	1.30985e+06	1.13709e+06	1.48682e+06	1.6517e+06	1.13662e+06
2-Ketobutyric acid	2.79762e+06	807236	0	1.23287e+06	0	955533
2-Octenoic acid	727487	6.8747e+06	7.4372e+06	8.88709e+06	9.47514e+06	3.38475e+06
2-PHOSPHOGLYCERATE	1.60849e+07	1.86979e+07	1.94215e+07	1.56272e+07	2.99124e+07	2.10588e+07
2-Propylpentanoic acid	2.47574e+06	2.1184e+07	2.81383e+07	3.43062e+07	3.1482e+07	1.05507e+07
2-QUINOLINECARBOXYLATE	2.44872e+07	2.42888e+07	3.07125e+07	2.72542e+07	2.97017e+07	4.17153e+07
3-Amino-4-methyl-pentanoic acid	7.12832e+08	748477405	6.66034e+08	1009381730	1130237035	9.85216e+08
3-Hydroxy-2-methyl-4-pyrone	514811	933308	188606	2.00865e+06	143427	530889
3-HYDROXYBENZALDEHYDE	2.52715e+06	7.83872e+06	9.0372e+06	8.83102e+06	9.03228e+06	3.5433e+06
3-HYDROXYBENZOATE	2.64898e+06	2.6485e+06	1.74303e+06	4.30159e+06	4.75302e+06	5.12398e+06
3-Hydroxybutyric acid	3.13638e+06	5.81625e+06	4.1698e+06	7.28409e+06	7.96058e+06	6.97611e+06
3-HYDROXYMETHYLGLUTARATE	3.56329e+07	4.91161e+07	3.58573e+07	6.81744e+07	8.38598e+07	9.68267e+07
3-HYDROXYPHENYLACETATE	508448	810760	665867	848074	289264	640854
3-Methyl-2-oxobutyrate	1.377e+06	1.93045e+06	1.57623e+06	1.83403e+06	1.96158e+06	1.39553e+06
3-Methyl-2-oxopentanoic acid	3.00391e+06	2.95863e+06	3.99035e+06	5.80827e+06	6.39716e+06	3.9425e+06
3-Methylglutaconic acid	1.96351e+06	2.0737e+06	2.0788e+06	2.81979e+06	2.4552e+06	2.42559e+06
3-Methyl-L-histidine	1.54834e+06	1.57316e+06	1.57672e+06	2.38357e+06	2.57227e+06	2.2139e+06
3-NITRO-L-TYROSINE	303984	1.57876e+06	1.2347e+06	1.03476e+06	56724	0
4-ACETAMIDOBUTANOATE	1.23118e+06	1.66607e+06	1.43476e+06	1.92085e+06	1.4927e+06	1.714e+06
4-Imidazoleacrylic acid	6.6441e+06	5.31576e+06	3.74723e+06	6.14579e+06	4.94085e+06	4.47098e+06
4-Nitrophenol	554878	1.47944e+06	1.0604e+06	1.33361e+06	1.66918e+06	815778
4-PYRIDOXATE	358896	808993	631099	835507	837319	445276
5-AMINOPENTANOATE	4.53156e+06	2.30037e+06	1.63708e+06	915468	1.5963e+06	1.77879e+06
5-Keto-D-gluconic acid	1.83077e+07	2.05939e+07	2.07685e+07	9.32962e+06	1.17263e+07	9.85532e+06
5-Phenylvaleric acid	821566	5.34543e+06	4.7955e+06	4.78941e+06	5.33082e+06	3.17746e+06
6-PHOSPHOGLUCONATE	2.0092e+06	1.2824e+06	967412	4.92362e+06	6.85546e+06	2.47627e+06
Acetyl coenzyme A	307341	341673	650797	67416.8	498527	407002
Ac-Val-OH	987283	1.148e+06	969685	1.06196e+06	1.25526e+06	931759
ADENINE	4.00944e+07	7.29112e+07	7.34475e+07	4.25245e+07	4.8791e+07	4.36362e+07
ADENOSINE	9.17333e+06	1.61724e+07	1.6568e+07	9.19473e+06	1.06141e+07	9.27389e+06
ADENOSINE 3',5'-DIPHOSPHATE	3.2724e+07	3.28163e+07	3.0894e+07	3.35808e+07	4.3119e+07	3.22037e+07
Adenosine 5′-monophosphate	2.2082e+06	3.58213e+06	4.04284e+06	45016.8	0	28990.3
ADENOSINE 5'-DIPHOSPHATE	3.59984e+07	4.87491e+07	4.87216e+07	2.09781e+07	1.8593e+07	1.76411e+07
ADENOSINE TRIPHOSPHATE	2.81004e+08	3.0406e+08	2.60831e+08	3.12048e+08	3.94658e+08	2.94514e+08
Alanine	1.38877e+08	1.39316e+08	1.31007e+08	2.26211e+08	2.67509e+08	2.44717e+08
ALLANTOIN	4.74329e+06	6.12243e+06	5.695e+06	7.50725e+06	7.82938e+06	5.83653e+06
ALLOTHREONINE	5.08761e+08	4.95053e+08	4.34405e+08	9.32212e+08	1096193942	1043676350
Alpha-Hydroxyglutaric acid	8.46674e+07	9.22717e+07	8.75049e+07	165793327	1.83754e+08	1.62404e+08
ALPHA-HYDROXYISOBUTYRATE	684283	882434	1.1132e+06	1.18601e+06	1.4243e+06	1.38469e+06
Alpha-Ketoglutaric acid	2.62029e+06	3.22155e+06	2.65366e+06	2.28975e+06	1.89272e+06	2.22871e+06
Arabinose	1.17281e+07	1.44071e+07	1.30218e+07	5.05056e+06	5.53141e+06	5.0164e+06
Arabitol	3.4882e+06	3.50488e+06	3.34674e+06	1.42342e+07	1.69673e+07	1.47454e+07
Arginine	6.34999e+07	7.50038e+07	7.06494e+07	8.79296e+07	9.69164e+07	8.52807e+07
Argininosuccinic acid	2.53612e+06	2.37025e+06	2.60016e+06	2.20024e+06	2.5155e+06	2.34363e+06
ASPARAGINE	1.82433e+07	1.95621e+07	1.70094e+07	1.91895e+07	2.32899e+07	1.89956e+07
ASPARTATE	1184089361	1260496725	1132146827	6.67909e+08	8.73372e+08	8.25789e+08
AZELATE	3.35443e+06	512605	636795	3.48726e+06	1.31356e+06	3.19127e+06
BENZOATE	8.09417e+06	2.95907e+07	3.45327e+07	3.71277e+07	3.57772e+07	1.781e+07
BETA-ALANINE	6.88011e+07	8.52595e+07	8.8199e+07	6.73428e+07	8.08023e+07	7.98278e+07
BETA-NICOTINAMIDE ADENINE DINUCLEOTIDE	3.14775e+07	3.2596e+07	2.45465e+07	4.55739e+07	4.01114e+07	3.74467e+07
Carnitine	895785	904133	663610	474572	514563	796328
CARNOSINE	1.0845e+06	1.41738e+06	1.21009e+06	2.57903e+06	2.77697e+06	2.43357e+06
Choline glycerophosphate	5.75888e+06	8.19797e+06	6.99006e+06	9.11811e+07	9.72404e+07	8.7847e+07
cis-Aconitic acid	7.56419e+06	1.25634e+07	1.39324e+07	2.80458e+07	3.03767e+07	2.84244e+07
CITICOLINE	834461	884264	860112	1.9828e+06	2.92058e+06	2.32455e+06
CITRATE	7.86828e+07	8.97757e+07	107156975	1.47518e+08	168477031	1.49556e+08
CITRULLINE	2.47091e+06	2.71212e+06	2.16509e+06	1.62413e+06	1.40052e+06	1.26552e+06
CREATINE 86ppm	7.79547e+07	7.52635e+07	7.10752e+07	1.11213e+08	1.36436e+08	1.24255e+08
CREATININE	7.29248e+06	6.79549e+06	7.55732e+06	1.23168e+07	1.17904e+07	1.30893e+07
Crotonic acid	4.2285e+06	6.85975e+06	4.3772e+06	3.97064e+06	3.90227e+06	3.6621e+06
CYCLIC AMP	1.17364e+06	1.5615e+06	1.63041e+06	1.72885e+07	3.17445e+07	4.4265e+07
Cyclohexanecarboxylic acid	108493	2.0707e+06	2.14238e+06	2.50006e+06	2.97501e+06	1.37627e+06
CYSTATHIONINE	2.41298e+07	2.11219e+07	2.16771e+07	1.22158e+07	1.38871e+07	1.30195e+07
CYSTEATE	388525	533987	423459	584275	612593	556708
Cysteine	375542	168178	228872	790425	845406	691064
Cystine	1.87449e+06	1.2573e+06	1.2851e+06	8.35541e+06	9.25694e+06	8.40182e+06
CYTIDINE	1.30938e+06	1.07028e+06	1.53091e+06	700049	1.13951e+06	1.20005e+06
CYTIDINE 2',3'-CYCLIC PHOSPHATE	7.29465e+06	9.74134e+06	1.06747e+07	8.17076e+06	7.3161e+06	5.66518e+06
CYTIDINE DIPHOSPHATE	3.04876e+06	3.88386e+06	3.85891e+06	2.09939e+06	1.86587e+06	1.80242e+06
CYTIDINE MONOPHOSPHATE	814144	1.06831e+06	1.26147e+06	1.65211e+06	1.6434e+06	1.42337e+06
CYTIDINE TRIPHOSPHATE	2.39624e+07	2.43179e+07	2.19359e+07	3.1892e+07	4.04977e+07	3.05748e+07
DEOXYGUANOSINE	240572	257693	234135	33613.9	91565.8	39082.8
DEOXYGUANOSINE-MONOPHOSPHATE	2.47475e+06	3.01591e+06	3.55239e+06	989036	999361	869543
DEOXYURIDINE	323213	391645	423513	805555	874999	884351
DIHYDROXYACETONE PHOSPHATE	3.94494e+07	5.70638e+07	6.86791e+07	9.65382e+07	8.30456e+07	7.44509e+07
Dimethylmalonic acid	0	784591	1.385e+06	318892	1.42787e+06	606483
D-RIBOSE 5-PHOSPHATE	2.86891e+06	6.78116e+06	8.46285e+06	1.91396e+07	2.69341e+07	2.77934e+07
D-Sorbitol	1.48018e+08	1.52236e+08	1.3418e+08	4.95023e+08	5.707e+08	5.43321e+08
ERYTHRITOL	5.66334e+06	5.88074e+06	5.10552e+06	9.55902e+06	1.02292e+07	9.12662e+06
Flavin adenine dinucleotide (FAD)	691245	893338	803077	232813	256500	480664
FOLATE	106995	199387	296205	500436	384329	268082
Fructose	1.75169e+07	1.96529e+07	1.53449e+07	2.79306e+07	2.65982e+07	2.39158e+07
FRUCTOSE BISPHOSPHATE	7.53899e+07	4.41568e+07	4.48519e+07	1.40937e+07	4.33339e+07	3.6145e+07
Fumaric acid	6.44897e+07	6.26991e+07	6.20448e+07	5.17044e+07	5.81692e+07	6.09062e+07
GAMMA-AMINOBUTYRATE	120195162	1.2385e+08	1.17494e+08	1.21154e+08	1.49278e+08	1.35762e+08
Gamma-Glu-epsilon-Lys	2.37419e+06	3.04233e+06	3.2637e+06	8.93295e+06	1.02063e+07	9.71128e+06
Gamma-L-Glutamyl-L-alanine	222597	149361	207403	2.38502e+06	3.41922e+06	2.91276e+06
Gluconate	3.47497e+07	6.84739e+07	6.8676e+07	1.60615e+08	1.99363e+08	1.69021e+08
Glucose	1.45671e+07	3.28031e+07	3.07754e+07	1.02547e+08	4.98884e+07	2.92632e+07
GLUCOSE 1-PHOSPHATE	2.00091e+07	1.7863e+07	1.81533e+07	4.50207e+07	5.26515e+07	4.89859e+07
GLUCOSE 6-PHOSPHATE	1.96394e+07	2.65878e+07	2.9027e+07	7.56344e+07	8.81623e+07	7.81107e+07
GLUCURONATE	8.64885e+06	1.00516e+07	9.45499e+06	8.64954e+06	1.08446e+07	9.81538e+06
GLUTAMATE	4238059780	4491486555	4152931201	4435362393	5246363126	4797400897
Glutamic acid 5-methyl ester	9.7113e+06	8.20735e+06	9.13715e+06	2.64055e+07	3.39202e+07	3.8259e+07
GLUTAMINE	6.4267e+08	671570769	546295497	1526058583	1686095223	1442701072
Glutathione oxidized	3.06101e+07	3.14048e+07	2.89986e+07	2.94373e+07	3.30132e+07	2.83005e+07
GLUTATHIONE REDUCED	5.69711e+07	7.11858e+07	5.515e+07	1.45089e+07	6.57072e+07	5.13282e+07
Glyceraldehyde 3-phosphate	5.42257e+06	5.88723e+06	4.02899e+06	2.31999e+07	1.73715e+07	1.97621e+07
GLYCERATE	2.19489e+07	2.51148e+07	2.92003e+07	6.32002e+07	6.37012e+07	7.02495e+07
GLYCEROL 3-PHOSPHATE	3.6623e+07	3.74593e+07	3.68339e+07	5.92379e+07	6.57568e+07	5.71724e+07
GLYCINE	9.72252e+07	8.95914e+07	8.40874e+07	1.11245e+08	1.27645e+08	1.10446e+08
Glycyl-L-tyrosine	173485	190351	203813	1.72185e+06	2.28106e+06	3.04568e+06
Gly-Gly	5.50667e+06	5.59161e+06	5.01638e+06	6.04275e+06	6.98334e+06	6.80938e+06
GUANOSINE	1.45226e+07	1.86796e+07	2.17046e+07	3.02586e+07	3.65792e+07	3.52476e+07
GUANOSINE DIPHOSPHATE	3.96145e+06	5.33677e+06	5.27376e+06	2.20781e+06	1.9001e+06	1.82014e+06
GUANOSINE DIPHOSPHATE MANNOSE	1.25411e+06	1.2359e+06	878956	1.15167e+06	1.48372e+06	1.11838e+06
GUANOSINE TRIPHOSPHATE	3.38256e+07	3.79743e+07	3.4218e+07	3.5211e+07	4.57896e+07	3.42948e+07
Gulonic acid gamma-lactone	4.56181e+06	5.47621e+06	4.38303e+06	2.13795e+06	3.03406e+06	2.42266e+06
Gulose	1.54943e+07	2.89807e+07	3.26204e+07	0	4.80876e+07	3.48478e+07
Heptanoic acid	1.19262e+06	6.91844e+06	7.69433e+06	1.02495e+07	1.0792e+07	3.47147e+06
HEXANOATE	2.70796e+06	1.15486e+07	1.71271e+07	2.70734e+07	1.79373e+07	8.07233e+06
HIPPURATE	2.33035e+06	3.34148e+06	2.86947e+06	3.47273e+06	3.24022e+06	2.41049e+06
HISTIDINE	1.6657e+07	1.85971e+07	1.84223e+07	1.32129e+07	1.6043e+07	1.58267e+07
HYDROXYPHENYLLACTATE	4.51279e+06	5.3557e+06	5.14037e+06	1.78972e+07	1.97216e+07	1.83434e+07
HYPOTAURINE	1.61326e+07	1.81234e+07	1.52872e+07	8.41799e+06	9.1715e+06	8.45115e+06
HYPOXANTHINE	86689.7	399702	401765	690342	348604	345134
Imidazolepropionic acid	1.17717e+06	2.33394e+06	1.3792e+06	3.65917e+06	4.1445e+06	1.69944e+06
Indole-3-lactic acid	169419	245515	233566	592001	627694	478596
INOSINE	324476111	4.3297e+08	5.32752e+08	8.29095e+08	1017772122	9.23649e+08
ISOLEUCINE	794442014	8.52691e+08	7.65199e+08	1026429561	1159290511	1030050145
Isovaleric acid	3.01891e+06	5.24147e+06	4.45537e+06	2.70443e+06	3.55856e+06	3.488e+06
Isovaleryl-L-carnitine	1.29003e+06	1.46323e+06	1.25932e+06	1.10813e+06	1.40783e+06	1.30954e+06
ITACONATE	5.02857e+06	5.16345e+06	4.90639e+06	1.17377e+07	1.31201e+07	1.10311e+07
KYNURENATE	1.70853e+06	2.2928e+06	2.16031e+06	449954	305946	343586
KYNURENINE	243138	153944	126258	2.48464e+06	2.92859e+06	2.43567e+06
Lactic acid	1194006272	1083801386	1097749329	1388743646	1605871235	1335422996
Lactobionic acid	495409	594879	561725	340578	327539	267313
Leu-Ala	568556	584808	745544	1.16654e+06	1.75617e+06	1.81225e+06
Leucine	7.09604e+08	7.48292e+08	6.65714e+08	1008033675	1129105825	9.84853e+08
Leu-Gly	8.63807e+06	7.17627e+06	9.38671e+06	9.38416e+06	1.22456e+07	1.27246e+07
Levulinic acid	675258	5.20136e+06	6.16216e+06	4.65802e+06	4.63092e+06	3.20151e+06
L-Methionine sulfoxide	1.1055e+07	1.06733e+07	9.74698e+06	1.34139e+07	1.34662e+07	1.24839e+07
Lysine	4.82616e+07	5.45537e+07	5.55282e+07	6.6117e+07	7.41567e+07	6.62048e+07
Malic acid	1324310124	1428396928	1372024058	1099604067	1227209337	1321693152
METHIONINE	1.46901e+08	1.57819e+08	1.43911e+08	266930597	302661776	2.62947e+08
Methyl 4-aminobutyrate	9.16963e+06	0	1.26901e+06	2.11446e+07	0	1.73364e+06
METHYL GALACTOSIDE	2.2781e+06	2.74971e+06	2.89091e+06	5.36476e+06	7.05557e+06	7.45075e+06
Myo-Inositol	4.60787e+08	4.52769e+08	4.00987e+08	8.94136e+07	9.41398e+07	9.33082e+07
N-(2-Methylbutyryl)glycine	628155	766106	671275	862993	738512	678204
N-(phenylacetyl)glycine	4.9061e+06	5.62153e+06	5.36927e+06	7.55301e+06	8.53389e+06	7.86357e+06
N-ACETYLALANINE	1.88062e+07	2.18845e+07	2.17998e+07	3.00161e+07	3.42339e+07	3.21489e+07
N-Acetyl-Asp-Glu	959387	944242	1.08231e+06	2.60633e+06	3.12645e+06	3.01526e+06
N-Acetylglucosamine	1.38704e+06	1.3847e+06	1.2808e+06	477467	730891	1.05858e+06
N-ACETYLGLUTAMATE	2.17595e+07	2.25857e+07	2.13634e+07	3.7673e+07	4.18391e+07	3.83068e+07
N-ACETYLGLYCINE	6.319e+06	4.27531e+06	6.45843e+06	4.13518e+06	5.01032e+06	4.89991e+06
N-Acetyl-L-aspartic acid	7.2882e+07	8.09761e+07	7.75788e+07	4.09085e+08	4.611e+08	429667147
N-ACETYLLEUCINE	300006	474933	336280	716255	657465	582206
N-Acetyl-L-glutamine	6.24038e+06	5.87563e+06	5.70654e+06	8.93853e+06	9.76598e+06	9.2957e+06
N-Acetyl-L-methionine	2.92809e+06	3.83783e+06	3.4544e+06	3.57796e+06	4.13262e+06	3.62868e+06
N-ACETYLNEURAMINATE	2.64488e+07	2.8022e+07	2.88327e+07	5.30059e+07	6.78751e+07	6.51728e+07
N-ACETYLPHENYLALANINE	92596.9	113669	74979.8	201256	158139	227080
NADH (Nicotinamide adenine dinucleotide (reduced)) (2)	3.41228e+07	4.49553e+07	5.6833e+07	4.80888e+07	8.56217e+07	7.69565e+07
NADP	2.71339e+06	2.98192e+06	3.13008e+06	4.14081e+06	4.74399e+06	4.80813e+06
N-Butyrylglycine	475103	641247	453955	518616	511358	498396
Nepsilon-Acetyl-L-lysine	573638	669844	588484	939451	908709	594750
N-FORMYL-L-METHIONINE	5.50609e+06	6.61506e+06	7.30763e+06	6.25889e+06	7.12356e+06	6.7762e+06
NICOTINAMIDE	6.23224e+06	6.08039e+06	7.9734e+06	2.96236e+07	3.38123e+07	2.55809e+07
O-ACETYLSERINE	222346709	241104973	2.30604e+08	1.79609e+08	2.08941e+08	1.96086e+08
O-PHOSPHOETHANOLAMINE	570181	813272	804618	7.44825e+07	8.24654e+07	7.00013e+07
OPHTHALMATE	4.38017e+06	5.266e+06	4.60206e+06	1.40083e+07	1.77893e+07	1.48273e+07
ORNITHINE	8.94443e+06	9.37391e+06	8.73001e+06	7.98422e+06	1.01656e+07	9.38935e+06
OROTATE	48225.4	0	41620.9	652013	796527	1.45023e+06
Orotidine	1.05256e+07	1.05041e+07	1.01424e+07	1.25372e+06	1.31015e+06	1.36258e+06
o-Toluic acid	724611	1.32228e+06	1.48173e+06	1.88182e+06	3.40885e+06	1.40573e+06
OXALATE	2.08476e+07	2.75254e+07	2.07614e+07	2.32902e+07	2.49555e+07	2.17492e+07
PANTOTHENATE	5.12796e+08	5.41311e+08	5.10685e+08	9.20918e+08	1102809477	9.83287e+08
Phe-Ala	100266	90908.5	195126	273071	458759	392756
Phe-Gly	330146	314134	259860	362418	1.44534e+06	679324
Phenol Red	1.72152e+07	2.73948e+07	27272043	4.04832e+07	4.14059e+07	3.40569e+07
PHENYLALANINE	4.64399e+08	5.00379e+08	4.57923e+08	6.67328e+08	7.42463e+08	6.65513e+08
Phenylglyoxylic acid	227837	323994	459123	546866	568060	281632
Phenylpyruvic acid	258956	420469	718303	563226	941684	510093
PHOSPHOCREATINE	1.6792e+08	189285258	1.66969e+08	5.61878e+08	6.29535e+08	570179029
PHOSPHOENOLPYRUVATE	7.56535e+06	9.1872e+06	8.61417e+06	7.44292e+06	1.18238e+07	8.54067e+06
PHOSPHONOACETATE	23818.5	53744.1	104891	317142	390406	240227
Phosphoric acid	1423656756	2578696697	2410403964	3199464960	3398258107	2651333569
PHOSPHORYLCHOLINE	4.28562e+07	5.06524e+07	4.64022e+07	4.90402e+07	5.94443e+07	5.5142e+07
PHOSPHOSERINE	665813	712147	617847	1.47334e+06	1.71228e+06	1.66492e+06
Pro-Gly	296815	701044	359657	2.45138e+06	4.86983e+06	2.00268e+06
PROLINE	3.14369e+08	290512943	2.73333e+08	3.55224e+08	4.48257e+08	4.02043e+08
PROPIONATE	3.82569e+06	3.1795e+06	4.02576e+06	4.26575e+06	5.65023e+06	4.72129e+06
Pseudouridine	2.16415e+06	2.9454e+06	2.95562e+06	4.10307e+06	4.0044e+06	3.04629e+06
Psicose	0	1.91206e+06	2.6719e+06	1.81777e+06	0	3.46698e+06
Pyridoxine	8.93547e+06	1.21984e+07	1.01065e+07	1.16198e+07	1.06346e+07	8.83501e+06
PYROGLUTAMATE	2324930795	3084862163	2740708949	3346823989	3434206892	2815824700
PYRROLE-2-CARBOXYLATE	817987	1.08137e+06	992892	5.04503e+06	4.94001e+06	5.2689e+06
Pyruvic acid	9.19052e+07	7.26623e+07	8.60993e+07	6.47119e+07	1.7111e+08	156459296
QUINATE	6.78698e+06	2.15832e+06	1.52455e+06	1.61674e+06	1.53472e+06	2.0343e+06
Riboflavin 5'-phosphate	647574	735789	862595	3.80301e+06	4.58253e+06	3.6696e+06
Ribose	7.2278e+06	8.25451e+06	7.48379e+06	2.21317e+06	2.56889e+06	1.62062e+06
S-(5'-Adenosyl)-L-methionine	499811	346738	314089	446261	605208	481989
SACCHARATE	2.64292e+06	2.76519e+06	3.29873e+06	4.35863e+06	4.93569e+06	3.63724e+06
Saccharic acid 1,4-lactone	4.68978e+06	4.25881e+06	4.37876e+06	4.69608e+06	3.15888e+06	3.15586e+06
Saccharopine	257274	66388.9	35927	673218	732149	651805
S-ADENOSYLHOMOCYSTEINE	1.71039e+06	2.0432e+06	2.19851e+06	1.70562e+06	2.00716e+06	1.91711e+06
SALICYLATE	838978	1.26269e+06	1.15082e+06	1.4816e+06	754790	818566
Sedoheptulose 7-phosphate	2.558e+06	2.39594e+06	2.75722e+06	1.25669e+07	1.49758e+07	12373598
SERINE	5.87637e+07	5.75596e+07	4.86625e+07	1.20699e+08	1.39696e+08	127319117
SUBERATE	1.34039e+06	1.53476e+06	1.16909e+06	1.87536e+06	1.38814e+06	1.70109e+06
SUCCINATE	3.68417e+07	4.29423e+07	4.07922e+07	4.23106e+07	5.3277e+07	4.38865e+07
Sucrose	2.6782e+06	100208	0	82183.6	0	71281.7
Tartrate	172618	481708	1.00826e+06	1.24528e+06	1.3335e+06	1.14544e+06
TAURINE	1897130896	2259366320	1915397160	1007418926	1131270151	1007891858
THIAMINE PYROPHOSPHATE	103097	204650	175433	141665	340426	205510
Threonic acid	2.62106e+08	3.1016e+08	3.11206e+08	5.5262e+08	5.93044e+08	4.95771e+08
THREONINE	5.08583e+08	4.9787e+08	4.35432e+08	9.32791e+08	1095334581	1042658751
Thymol	920256	1.24682e+06	1.73073e+06	2.21561e+06	2.01367e+06	1.56636e+06
TRANS-4-HYDROXY-L-PROLINE	1.35818e+07	1.30668e+07	1.18919e+07	2.34949e+07	2.71355e+07	2.49078e+07
TREHALOSE	2.74864e+06	2.89093e+06	2.93648e+06	1.00294e+06	1.46289e+06	995090
Tricarballylic acid	475392	563330	594352	715943	861646	792223
TRYPTOPHAN	1.38104e+08	153074291	1.41941e+08	212893028	2.49141e+08	2.20467e+08
TYROSINE	2.79135e+08	290531135	2.53213e+08	356956075	3.97972e+08	3.96478e+08
URACIL	647210	0	0	4.90748e+06	9.57771e+06	6.90883e+06
Ureidosuccinic acid	23321	17536.5	107639	1.33606e+06	1.56839e+06	1.70338e+06
Uric acid	1.58008e+07	2.7359e+07	2.56632e+07	3.8435e+07	3.77314e+07	2.86795e+07
URIDINE	1.58183e+08	1.79891e+08	1.83363e+08	8.72534e+08	1000667489	8.45282e+08
URIDINE 5'-DIPHOSPHATE	1.07811e+07	1.3698e+07	1.41456e+07	5.81058e+06	5.25042e+06	4.72999e+06
Uridine 5'-monophosphate	877042	1.17062e+06	1.03199e+06	26983.8	60750	134000
URIDINE DIPHOSPHATE GLUCOSE	5.62929e+07	6.27911e+07	6.99609e+07	5.60861e+07	7.03961e+07	7.1494e+07
URIDINE DIPHOSPHATE GLUCURONIC ACID	7.58823e+06	8.48043e+06	9.85436e+06	2.85992e+06	4.0784e+06	5.36275e+06
URIDINE DIPHOSPHATE-N-ACETYLGLUCOSAMINE	7.22163e+07	8.53604e+07	8.47841e+07	6.08884e+07	7.51473e+07	9.06358e+07
URIDINE TRIPHOSPHATE	7.94363e+07	7.85056e+07	7.00296e+07	8.01655e+07	9.96189e+07	7.96306e+07
Valeric acid	1.76386e+06	2.74095e+06	2.94666e+06	3.08333e+06	2.08882e+06	2.21498e+06
VALINE	2.93111e+08	3.08518e+08	275383511	3.37128e+08	3.99586e+08	3.49064e+08
Vanillin	934925	2.32273e+06	2.16059e+06	3.21574e+06	3.54678e+06	1.4757e+06
XANTHINE	1.21834e+07	1.8254e+07	1.61727e+07	2.35225e+07	2.85542e+07	2.22249e+07
XANTHOSINE	326810	487373	325262	3.90648e+06	4.12836e+06	3.85271e+06
