# Supplementary material
Source: publisher site journal article supplement (doi:10.18632/aging.206390)
Supplement: Supplementary file 3 [file aging-v18i1-206390-supplementary-material-SD4.pdf]

**Supplementary Table 3. Mass cytometry panel.**

| <b>Marker</b> | <b>Metal</b> |
|---------------|--------------|
| CD45          | 89Y          |
| Ly6G/C        | 141Pr        |
| CD11b         | 148Nd        |
| gH2AX         | 149Sm        |
| TERM2         | 152Sm        |
| CD38          | 154Sm        |
| Tmem119       | 157Gd        |
| P2RY12        | 160Gd        |
| CD11c         | 162Dy        |
| CX3CR1        | 164Dy        |
| p16           | 165Ho        |
| p19           | 166Er        |
| Plin2         | 168Er        |
| CD206         | 169Tm        |
| ApoE          | 173Yb        |
